# Supplementary material
Source: Royal Society of Chemistry journal article supplement (doi:10.1039/d6nj00972g)
Supplement: d6nj00972g1.pdf [file d6nj00972g1.pdf]

## Supplementary Information

### **Facile synthesis of $\text{Co}_3\text{O}_4/\text{g-C}_3\text{N}_4$ with enhanced peroxidase-like activity for colorimetric detection of glutathione and L-cysteine**

**Xiaoxia Hu<sup>a,b,\*</sup>, Xin Yang<sup>c</sup>, Chunhua Wang<sup>a</sup>, Tiantian Tan<sup>a</sup>, Xiaojie Liu<sup>a,d</sup>,  
Xiaodan Liu<sup>a,b,\*</sup>**

<sup>a</sup>School of Food and Tourism, Shanghai Urban Construction Vocational College, Shanghai 201415, China

<sup>b</sup>Department of Food Science and Engineering, School of Agriculture and Biology, Shanghai Jiao Tong University, Shanghai 200240, China

<sup>c</sup>Department of Rehabilitation Therapy, Hebei Provincial Corps of Chinese People's Armed Police Force, Shijiazhuang, Hebei 050081, China

<sup>d</sup>Research Institute of Urban Food Safety, Shanghai Urban Construction Vocational College, Shanghai 201415, China

\*Corresponding authors: Xiaoxia Hu, Xiaodan Liu

E-mail addresses: [huxiaoxia@succ.edu.cn](mailto:huxiaoxia@succ.edu.cn), [liuxiaodan@succ.edu.cn](mailto:liuxiaodan@succ.edu.cn)

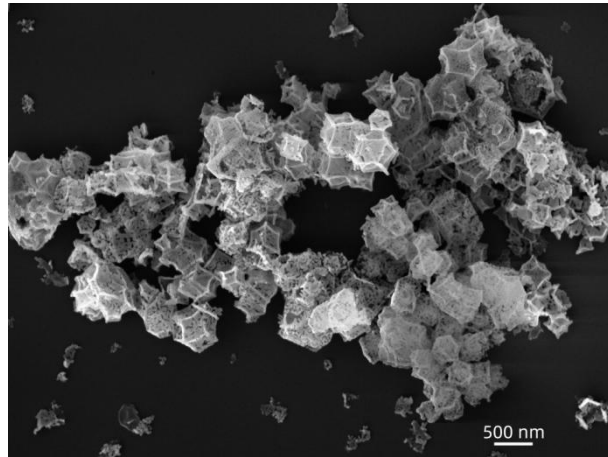

**Fig.S1** The FESEM image of  $\text{Co}_3\text{O}_4$ .

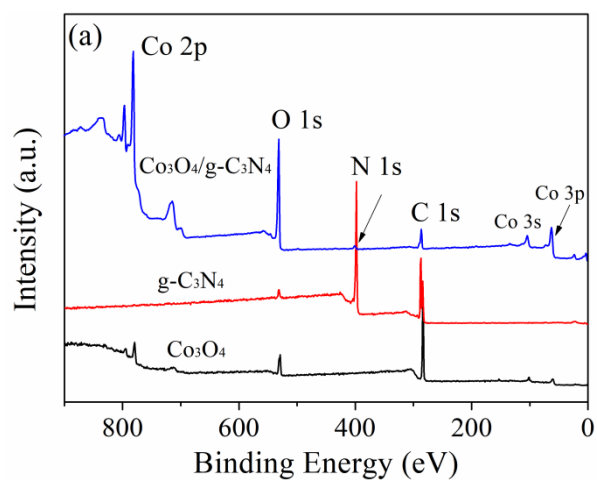

**Fig.S2** The survey scan spectrum of  $\text{Co}_3\text{O}_4$ ,  $\text{g-C}_3\text{N}_4$  and  $\text{Co}_3\text{O}_4/\text{g-C}_3\text{N}_4$ .

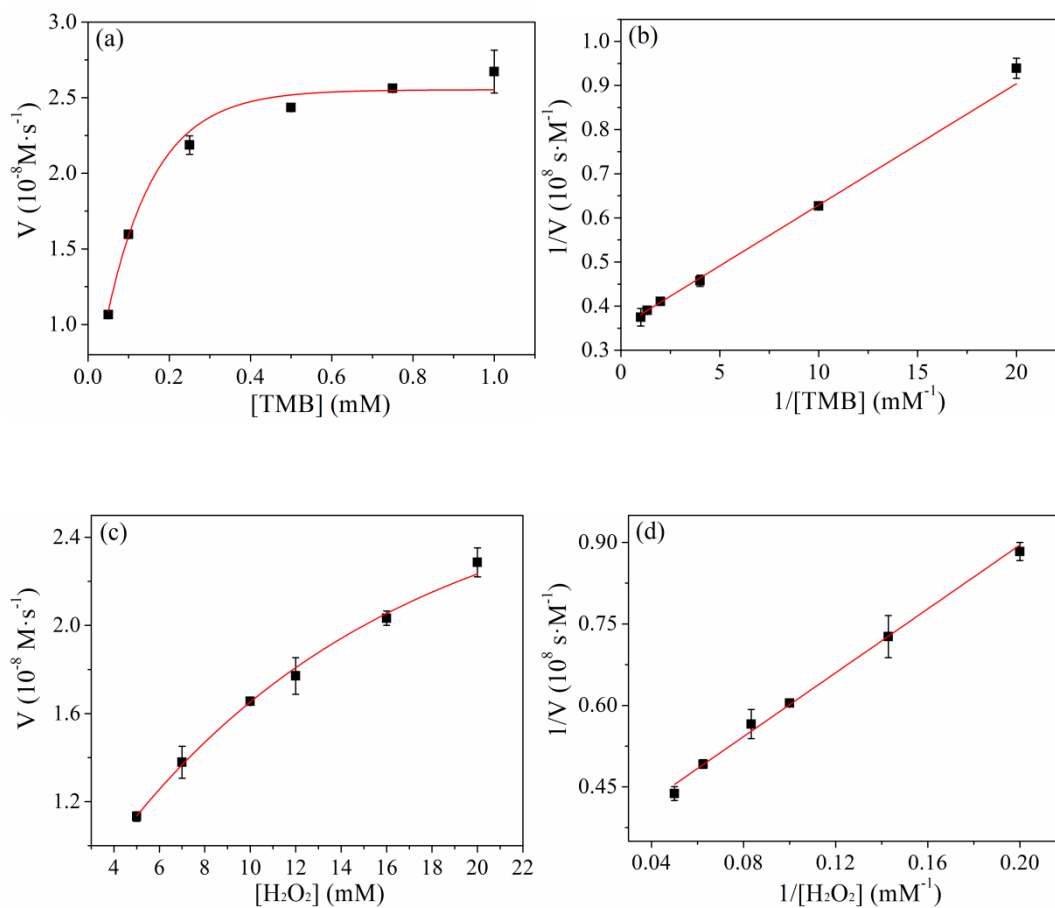

**Fig.S3** Peroxidase kinetic analysis of  $\text{Co}_3\text{O}_4$ : (a) Variation of TMB at the concentration of  $\text{H}_2\text{O}_2$  fixed at 10.0 mM; (b) The Lineweaver-Burk plots corresponding to (a); (c) Variation of  $\text{H}_2\text{O}_2$  at the concentration of TMB fixed at 0.5 mM; (d) The Lineweaver-Burk plots corresponding to (c).

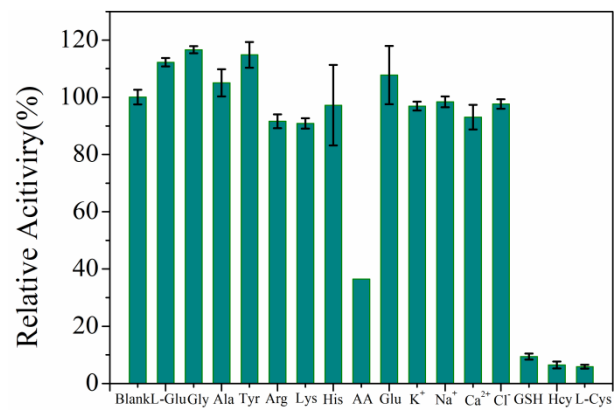

**Fig.S4** The selectivity of colorimetric detection system developed based on the  $\text{Co}_3\text{O}_4/\text{g-C}_3\text{N}_4$  nanoenzyme with different substances.

**Table S1** Comparison of detection performance for GSH or L-Cys in current reports

| Nanozymes                                                       | GSH                  |         | L-Cys                |          | Ref       |
|-----------------------------------------------------------------|----------------------|---------|----------------------|----------|-----------|
|                                                                 | Linear Range         | LOD     | Linear Range         | LOD      |           |
| Co <sub>3</sub> Fe-MMOF                                         | 0.012~0.2 mM         | 0.07 mM |                      |          | [1]       |
| Cu@Co-MOFs                                                      | 1~1200 μM            | 0.72 μM |                      |          | [2]       |
| m-CuS                                                           | 1~20 μM<br>20~300 μM | 0.1 μM  |                      |          | [3]       |
| Sr-MnO <sub>2</sub>                                             | 5~40 μM              | 0.46 μM |                      |          | [4]       |
| MIL-88A(Fe)                                                     | 0~40 μM              | 0.15 μM |                      |          | [5]       |
| Co-N-C                                                          |                      |         | 0.1~10 μM            | 0.1 μM   | [6]       |
| Cu-BPTZ-POM/g-C <sub>3</sub> N <sub>4</sub> (3)                 |                      |         | 0.1~30 μM            | 0.047 μM | [7]       |
| Fe,N-GQDs                                                       |                      |         | 0.5~50 μM            | 0.14 μM  | [8]       |
| L-His@AuNCs                                                     |                      |         | 1~7 μM               | 0.8 μM   | [9]       |
| Co-HPNC@NC                                                      |                      |         | 1~40 μM<br>40~110 μM | 0.17 μM  | [10]      |
| Co <sub>3</sub> O <sub>4</sub> /g-C <sub>3</sub> N <sub>4</sub> | 0~30 μM              | 0.54 μM | 1~30 μM              | 0.52 μM  | This work |

## References

- [1] X. X. Wei, S. Y. Qi, T. T. Fu, H. G. Zhu, Z. Y. Meng, W. Q. Gong, J. X. Qiu, D. P. Xu, Cobalt-iron mixed-metal-organic framework (Co<sub>3</sub>Fe-MMOF) with high oxidase mimicking activity for sensitive colorimetric detection of glutathione, *J. Food Compos. Anal.* 122 (2023) 105472. <https://doi.org/10.1016/j.jfca.2023.105472>
- [2] Y. H. Gu, J. P. Han, N. Zhang, W. S. Yan, Y. Guo, H. Y. Tan, C. Y. Yang, F. K. Wang, H. Q. Yao, Bimetallic Cu@ Co-MOFs mimic peroxidase for colorimetric detection of glutathione, *ACS Appl. Nano Mater.* 7(21) (2024) 24683-24696. <https://doi.org/10.1021/acsanm.4c04563>
- [3] X. W. Zhang, J. Wang, N. Chang, Y. Yang, Y. Q. Li, Q. Wei, C. Ni, W. Y. Song, M. Y. Ma, X. Feng, R. H. Fan, Cu-BTC Derived Mesoporous CuS Nanomaterial as Nanozyme for Colorimetric Detection of Glutathione, *Molecules* 29(9) (2024) 2117. <https://doi.org/10.3390/molecules29092117>

- [4] W. Shi, X. Y. Wang, Z. P. Yang, J. Yang, X. Y. Fu, X. X. Wang, Sr-doped MnO<sub>2</sub> with enhanced dual-enzyme mimetic activity for colorimetric detection of glutathione and 2,4-dichlorophenol, *Microchem. J.* 212 (2025) 113166. <https://doi.org/10.1016/j.microc.2025.113166>
- [5] N. Kumar, H. Singh, A. Deep, M. Khatri, N. Bhardwaj, Smartphone-assisted colorimetric detection of glutathione in food and pharmaceutical samples using MIL-88A (Fe) [J], *Spectrochim. Acta A* 326 (2025) 125297. <https://doi.org/10.1016/j.saa.2024.125297>
- [6] Y. Han, X. H. Tang, X. Y. Wu, H. Y. Shi, L. Huang, L. Wei, M. M. Li, Y. Zhang, Single-atom Co-N-C nanozymes with excellent oxidase-like activity for colorimetric detection of L-cysteine, *Spectrochim. Acta A* 332 (2025) 125778. <https://doi.org/10.1016/j.saa.2025.125778>
- [7] X. Yao, H. Yang, Q. M. Liang, Z. D. Wei, Y. S. Zhang, L. Wang, J. W. Sun, Synergistic Nanozyme Platform Based on Interpenetrated POMOF and g-C<sub>3</sub>N<sub>4</sub> for Colorimetric Determination of H<sub>2</sub>O<sub>2</sub> and L-Cys, *J. Mol. Struct.* 1347 (2025) 143352. <https://doi.org/10.1016/j.molstruc.2025.143352>
- [8] X. C. Deng, J. W. Zhao, Y. Ding, H. L. Tang, F. N. Xi, Iron and nitrogen co-doped graphene quantum dots as highly active peroxidases for the sensitive detection of L-cysteine, *New Journal of Chemistry*, 45(40) (2021) 19056-19064. <https://doi.org/10.1039/d1nj03559b>
- [9] W. Liu, K. L. Wang, Y. You, J. F. Shangguan, M. J. Yuan, S. Y. Wang, A new colorimetric assay based on an assembly of gold nanoparticles and gold nanoclusters for Ag<sup>+</sup> and L-cysteine detection, *New J. Chem.* 49(31) (2025) 13369-13375. <https://doi.org/10.1039/d5nj01702e>
- [10] R. Zhang, S. H. Zhang, J. H. Lu, Y. Wu, J. J. Zhao, Z. J. Wang, Polydopamine-coated bimetallic ZIF derivatives as a H<sub>2</sub>O<sub>2</sub>-free oxidase mimetic for the colorimetric sensing of L-cysteine, *New J. Chem.* 48(10) (2024) 4437-4445. <https://doi.org/10.1039/d3nj05036j>
